# Supplementary material for: Comparing modified substrate-induced respiration with selective inhibition (SIRIN) and N 2 O isotope approaches to estimate fungal contribution to denitrification in three arable soils under anoxic conditions
Source: Copernicus journal article supplement (doi:10.5194/bg-18-4629-2021), 2021-08-12
Supplement: Supplementary file 1 [file bg-18-4629-2021-supplement.pdf]

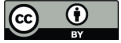

*Supplement of*

**Comparing modified substrate-induced respiration with selective inhibition (SIRIN) and N<sub>2</sub>O isotope approaches to estimate fungal contribution to denitrification in three arable soils under anoxic conditions**

**Lena Rohe et al.**

*Correspondence to:* Lena Rohe ([lena.rohe@ufz.de](mailto:lena.rohe@ufz.de))

The copyright of individual parts of the supplement might differ from the article licence.

**Table S1: Important terms used in the present study and descriptions of terms with presenting the associated sections.**

| Term                                                                                                                                                                                                                  | Description                                                                                                                                                                                                                                                                                                                                                                                                                                            | Eq.        | Section                 |
|-----------------------------------------------------------------------------------------------------------------------------------------------------------------------------------------------------------------------|--------------------------------------------------------------------------------------------------------------------------------------------------------------------------------------------------------------------------------------------------------------------------------------------------------------------------------------------------------------------------------------------------------------------------------------------------------|------------|-------------------------|
| NO <sub>3</sub> <sup>-</sup><br>NO <sub>2</sub> <sup>-</sup><br>NO<br>N <sub>2</sub> O<br>N <sub>2</sub><br>KNO <sub>3</sub><br>NH <sub>4</sub> <sup>+</sup><br>CO <sub>2</sub><br>C <sub>2</sub> H <sub>2</sub><br>O | Nitrate: electron acceptor for denitrification<br>Nitrite: electron acceptor for denitrification<br>Nitrogen monoxide: intermediate of denitrification<br>Nitrous oxide: intermediate or product of denitrification<br>Dinitrogen: end product of denitrification<br>Potassium nitrate: electron acceptor for denitrification<br>Ammonia<br>Carbon dioxide: product of respiration<br>Acetylene used to block the N <sub>2</sub> O reductase<br>oxygen | /          | 1, 2                    |
| Nos                                                                                                                                                                                                                   | N <sub>2</sub> O reductase                                                                                                                                                                                                                                                                                                                                                                                                                             | /          | 1                       |
| $\delta^{15}\text{N}^{\text{bulk}}_{\text{N}_2\text{O}}$                                                                                                                                                              | $\delta^{15}\text{N}$ values of produced N <sub>2</sub> O                                                                                                                                                                                                                                                                                                                                                                                              | /          | 1                       |
| $\delta^{15}\text{N}_{\text{NO}_x}$                                                                                                                                                                                   | $\delta^{15}\text{N}^{\text{bulk}}$ values of N <sub>2</sub> O precursors NO <sub>3</sub> <sup>-</sup> or NO <sub>2</sub> <sup>-</sup>                                                                                                                                                                                                                                                                                                                 | /          | 2.1                     |
| <i>SP<sub>N2O</sub></i>                                                                                                                                                                                               | <sup>15</sup> N site preference of N <sub>2</sub> O; i.e. difference between $\delta^{15}\text{N}$ of the central and terminal N-position of the asymmetric N <sub>2</sub> O molecule (Toyoda and Yoshida, 1999).                                                                                                                                                                                                                                      | /          | 1, 2.3, 2.5             |
| $\delta^{18}\text{O}_{\text{N}_2\text{O}}$                                                                                                                                                                            | $\delta^{18}\text{O}$ values of produced N <sub>2</sub> O                                                                                                                                                                                                                                                                                                                                                                                              | /          | 1                       |
| $\delta^{18}\text{O}_{\text{NO}_x}$                                                                                                                                                                                   | $\delta^{18}\text{O}$ values of N <sub>2</sub> O precursors NO <sub>3</sub> <sup>-</sup> or NO <sub>2</sub> <sup>-</sup>                                                                                                                                                                                                                                                                                                                               | /          | 1                       |
| $\delta^{18}\text{O}_{\text{H}_2\text{O}}$                                                                                                                                                                            | $\delta^{18}\text{O}$ values of water (H <sub>2</sub> O)                                                                                                                                                                                                                                                                                                                                                                                               | /          | 1, 2.5.2                |
| <i>Soil 1.1</i><br><i>Soil 1.2</i><br><i>Soil 2</i><br><i>Soil 3</i>                                                                                                                                                  | loamy sand sampled in June 2011<br>loamy sand sampled in December 2012<br>sand sampled in January 2013<br>silt loam sampled in December 2012                                                                                                                                                                                                                                                                                                           | /          | 2.1;<br>Table 1         |
| <i>F:B</i>                                                                                                                                                                                                            | Respiratory fungal-to-bacterial ratio analysed by SIRIN method (Anderson and Domsch, 1973, 1975)                                                                                                                                                                                                                                                                                                                                                       | /          | 1, 2.2;<br>Table 1      |
| <i>SIR</i>                                                                                                                                                                                                            | Substrate-induced respiration                                                                                                                                                                                                                                                                                                                                                                                                                          | /          | 2.2.1;<br>Table 1       |
| <i>c<sub>opt</sub>(cycloheximide),<br/>c<sub>opt</sub>(streptomycin)</i>                                                                                                                                              | optimal concentration for inhibition of fungal respiration                                                                                                                                                                                                                                                                                                                                                                                             |            | 2.1                     |
| <i>SIRIN</i><br>treatment A<br>treatment B<br>treatment C<br>treatment B                                                                                                                                              | Substrate-induced respiration with selective inhibition (Anderson and Domsch, 1973, 1975)<br>without addition of inhibitor, but amended with glucose<br>with addition of inhibitor for bacterial growth (streptomycin) and glucose<br>with addition of inhibitor for fungal growth (cycloheximide) and glucose<br>with addition of bot inhibitors (streptomycin, cycloheximide) and glucose                                                            | 1, 2,<br>3 | 1, 2.2.1,<br>2.2.2, 2.4 |
| <i>f<sub>FDmi</sub></i>                                                                                                                                                                                               | fungal contribution to N <sub>2</sub> O production during denitrification with microbial inhibition                                                                                                                                                                                                                                                                                                                                                    | 3          | Table 5                 |
| <i>Variant traced</i><br><i>Variant +C<sub>2</sub>H<sub>2</sub></i><br><i>Variant -C<sub>2</sub>H<sub>2</sub></i>                                                                                                     | <sup>15</sup> N tracer technique was used to estimate the effect of N <sub>2</sub> O reduction on N <sub>2</sub> O produced<br>Natural isotopic conditions and C <sub>2</sub> H <sub>2</sub> addition to the headspace (10 kPa) to block N <sub>2</sub> O reduction<br>Natural isotopic conditions and no C <sub>2</sub> H <sub>2</sub> addition to the headspace                                                                                      | /          | 1; 2.2.2;<br>Figure 1   |
| <i>WFPS</i>                                                                                                                                                                                                           | Water filled pore space                                                                                                                                                                                                                                                                                                                                                                                                                                | /          | 2.2                     |
| <i>GC</i>                                                                                                                                                                                                             | Gas chromatography                                                                                                                                                                                                                                                                                                                                                                                                                                     | /          | 2.3                     |
| <i>c(N<sub>2</sub>O), c(CO<sub>2</sub>)</i>                                                                                                                                                                           | N <sub>2</sub> O and CO <sub>2</sub> concentrations analysed by GC                                                                                                                                                                                                                                                                                                                                                                                     | /          | 2.3,<br>Figure 1        |
| <i>IRMS</i>                                                                                                                                                                                                           | Isotope ratio mass spectrometry                                                                                                                                                                                                                                                                                                                                                                                                                        | /          | 2.5                     |

|                                      |                                                                                                                                                                                                                                                                                                                                                                                                                                                                                                                                                                                  |   |                         |
|--------------------------------------|----------------------------------------------------------------------------------------------------------------------------------------------------------------------------------------------------------------------------------------------------------------------------------------------------------------------------------------------------------------------------------------------------------------------------------------------------------------------------------------------------------------------------------------------------------------------------------|---|-------------------------|
| IEM                                  | the isotope endmember mixing approach proposed by Ostrom et al. (2010)                                                                                                                                                                                                                                                                                                                                                                                                                                                                                                           | / | 1, 2.5.1                |
| $SP_{prod}$                          | $SP_{N_2O}$ values of $N_2O$ produced in soil                                                                                                                                                                                                                                                                                                                                                                                                                                                                                                                                    | 4 | 1, 2.5.1                |
| $f_{FD}$                             | Fraction of fungi contributing to $N_2O$ production during denitrification                                                                                                                                                                                                                                                                                                                                                                                                                                                                                                       | 4 | 2.5.1                   |
| $f_{BD}$                             | Fraction of bacteria contributing to $N_2O$ production during denitrification                                                                                                                                                                                                                                                                                                                                                                                                                                                                                                    | 4 | 2.5.1                   |
| $SP_{FD}$                            | $SP_{N_2O}$ values produced by fungi contributing to $N_2O$ production during denitrification                                                                                                                                                                                                                                                                                                                                                                                                                                                                                    | 4 | 2.5.1                   |
| $SP_{BD}$                            | $SP_{N_2O}$ values produced by bacteria contributing to $N_2O$ production during denitrification                                                                                                                                                                                                                                                                                                                                                                                                                                                                                 | 4 | 2.5.1                   |
| $f_{FD\_SP}$                         | $SP_{N_2O}$ values produced by fungi calculated with IEM using results of variant $+C_2H_2$ ; assuming $SP_{N_2O}$ values of $N_2O$ produced by bacteria were 3.7 ‰ (resulting in negative fraction and therefore set to zero) or -7.5 ‰. Using the minimum and maximum $SP_{N_2O}$ values known for bacteria resulted in a $f_{FD\_SP}$ range.                                                                                                                                                                                                                                  | 4 | 2.5.1, Table 5          |
| $f_{FD\_SPpot}$                      | Maximum potential fungal fraction of $N_2O$ production calculated by with IEM for all treatments of variant $-C_2H_2$ assuming $SP_{N_2O}$ values of $N_2O$ produced by bacterial denitrification or nitrifier denitrification were between 3.7 and -10.7 ‰ (Frame and Casciotti, 2010; Yu et al., 2020) or produced by fungal denitrification or nitrification were between 16 and 37 ‰ (Sutka et al., 2008; Decock and Six, 2013; Rohe et al., 2014a; Maeda et al., 2015; Rohe et al., 2017). Here, the effect of potential partial reduction of $N_2O$ could not be included. | 4 | 2.5.1, Table 5          |
| SP/ $\delta^{18}O$ Map               | isotope mapping approach was further developed (SP/ $\delta^{18}O$ Map) using $\delta^{18}O_{N_2O}$ and $SP_{N_2O}$ values of $N_2O$ and $\delta^{18}O$ values of precursors (Lewicka-Szczebak et al., 2017; Lewicka-Szczebak et al., 2020)                                                                                                                                                                                                                                                                                                                                      | / | 1, 2.5.2                |
| $f_{FD\_MAP}$                        | $f_{FD}$ contributing to $N_2O$ production from denitrification in soil samples estimated with the SP/ $\delta^{18}O$ Map                                                                                                                                                                                                                                                                                                                                                                                                                                                        | / | 2.5.2, Table 4, Table 5 |
| $r_{MAP}$                            | $N_2O$ product ratio [ $N_2O/(N_2+N_2O)$ ] estimated with the SP/ $\delta^{18}O$ Map                                                                                                                                                                                                                                                                                                                                                                                                                                                                                             | / | 2.5.2                   |
| $r_{15N}$                            | $N_2O$ product ratio [ $N_2O/(N_2+N_2O)$ ] derived from variant <i>traced</i>                                                                                                                                                                                                                                                                                                                                                                                                                                                                                                    | 5 | 2.5.3                   |
| $^{15}N_{N_2O}, ^{15}N_{N_2}$        | $^{15}N$ -labeling of $N_2O$ or $N_2$ produced                                                                                                                                                                                                                                                                                                                                                                                                                                                                                                                                   | 5 | 2.5.3                   |
| $r_{C_2H_2}$                         | $N_2O$ product ratio [ $N_2O/(N_2+N_2O)$ ] calculated from $N_2O$ production rates of variants $-C_2H_2$ and $+C_2H_2$                                                                                                                                                                                                                                                                                                                                                                                                                                                           | 6 | 2.5.3                   |
| $N_2O_{-C_2H_2}$<br>$N_2O_{+C_2H_2}$ | $N_2O$ produced in variants $-C_2H_2$ and $+C_2H_2$ , respectively                                                                                                                                                                                                                                                                                                                                                                                                                                                                                                               | 6 | 2.5.3                   |
| $SP_{N_2O-r}$                        | $^{15}N$ site preference values of produced $N_2O$ , i.e. without its reduction to $N_2O$ ( $SP_{prod}$ ), of variant $-C_2H_2$                                                                                                                                                                                                                                                                                                                                                                                                                                                  | 7 | 2.5.3                   |
| $\eta_r$                             | Net isotope effect of $N_2O$ reduction                                                                                                                                                                                                                                                                                                                                                                                                                                                                                                                                           | 7 | 2.5.3                   |
| $\delta\theta$                       | isotopic values of $N_2O$ produced without $N_2O$ reduction effects of variant $+C_2H_2$                                                                                                                                                                                                                                                                                                                                                                                                                                                                                         | / | 2.5.3                   |
| $f_{FD\_SPcalc}$                     | From variant $-C_2H_2$ , $SP_{N_2O}$ values of $N_2O$ produced by bacteria was 3.7 (resulting in negative fraction and therefore set to zero) or -7.5 ‰ and using reduction correction with $\eta_r=-6$ ‰ to calculate $SP_{prod}$ values (Senbayram et al., 2018; Yu et al., 2020). Using the minimum and maximum $SP_{N_2O}$ values known for bacteria resulted in a $f_{FD\_SP}$ range.                                                                                                                                                                                       | 7 | 2.5.3, Table 5          |
| $a_p$                                | calculate the fraction of $N_2$ and $N_2O$ originating from the $^{15}N$ -labelled N pool as well as the $^{15}N$ enrichment of that N pool                                                                                                                                                                                                                                                                                                                                                                                                                                      | / | 4.4                     |
| $^{15}N_{N_2O\_exp}$                 | expected $^{15}N$ enrichment in $N_2O$ produced assuming that denitrification is the only process producing $N_2O$ in the incubation experiment                                                                                                                                                                                                                                                                                                                                                                                                                                  | 8 | 2.6                     |
| $N_{soils}, N_{fert}, N^{bulk}$      | amount of N [mg] in unfertilized soil samples                                                                                                                                                                                                                                                                                                                                                                                                                                                                                                                                    | 8 | 2.6                     |

|                                  |                                                                                                    |   |     |
|----------------------------------|----------------------------------------------------------------------------------------------------|---|-----|
| $^{15}N_{nat}$ , $^{15}N_{fert}$ | $^{15}N$ enrichment under natural conditions (0.3663 at%) and in fertilizer (50 at%), respectively | 8 | 2.6 |
|----------------------------------|----------------------------------------------------------------------------------------------------|---|-----|

### Determining optimal concentrations for SIR and SIRIN

5 As described in the Material and Methods section, optimal concentrations of glucose or inhibitors streptomycin and cycloheximide were determined by SIR or SIRIN method using an automated incubation system using an "Ultragas 3" CO<sub>2</sub> analyser (WösthoffCo., Bochum) with continuous gas flow and analysed with the software "SIR-SBA 4.00" (Heinemeyer, copyright MasCo Analytik, Hildesheim, Germany) (Anderson and Domsch, 1973, 1975, 1978). This program enabled to analyse respiration curves for biomass and F:B ratio in soil. However, as data were

10 generated by this software of the incubation system raw data could not be exported and it is thus not possible to represent all tested concentrations and replicates for one soil in one figure. Therefore, results for one representative replicate with glucose concentrations between 0.75 and 2 mg g<sup>-1</sup> soil as an example is presented for *Soils 1 to 3* (Figure S1). Additionally, one representative respiration curve of pre-experiments using the SIRIN approach is represented as an example for each with optimum concentrations of streptomycin and cycloheximide (Figure S2).

15

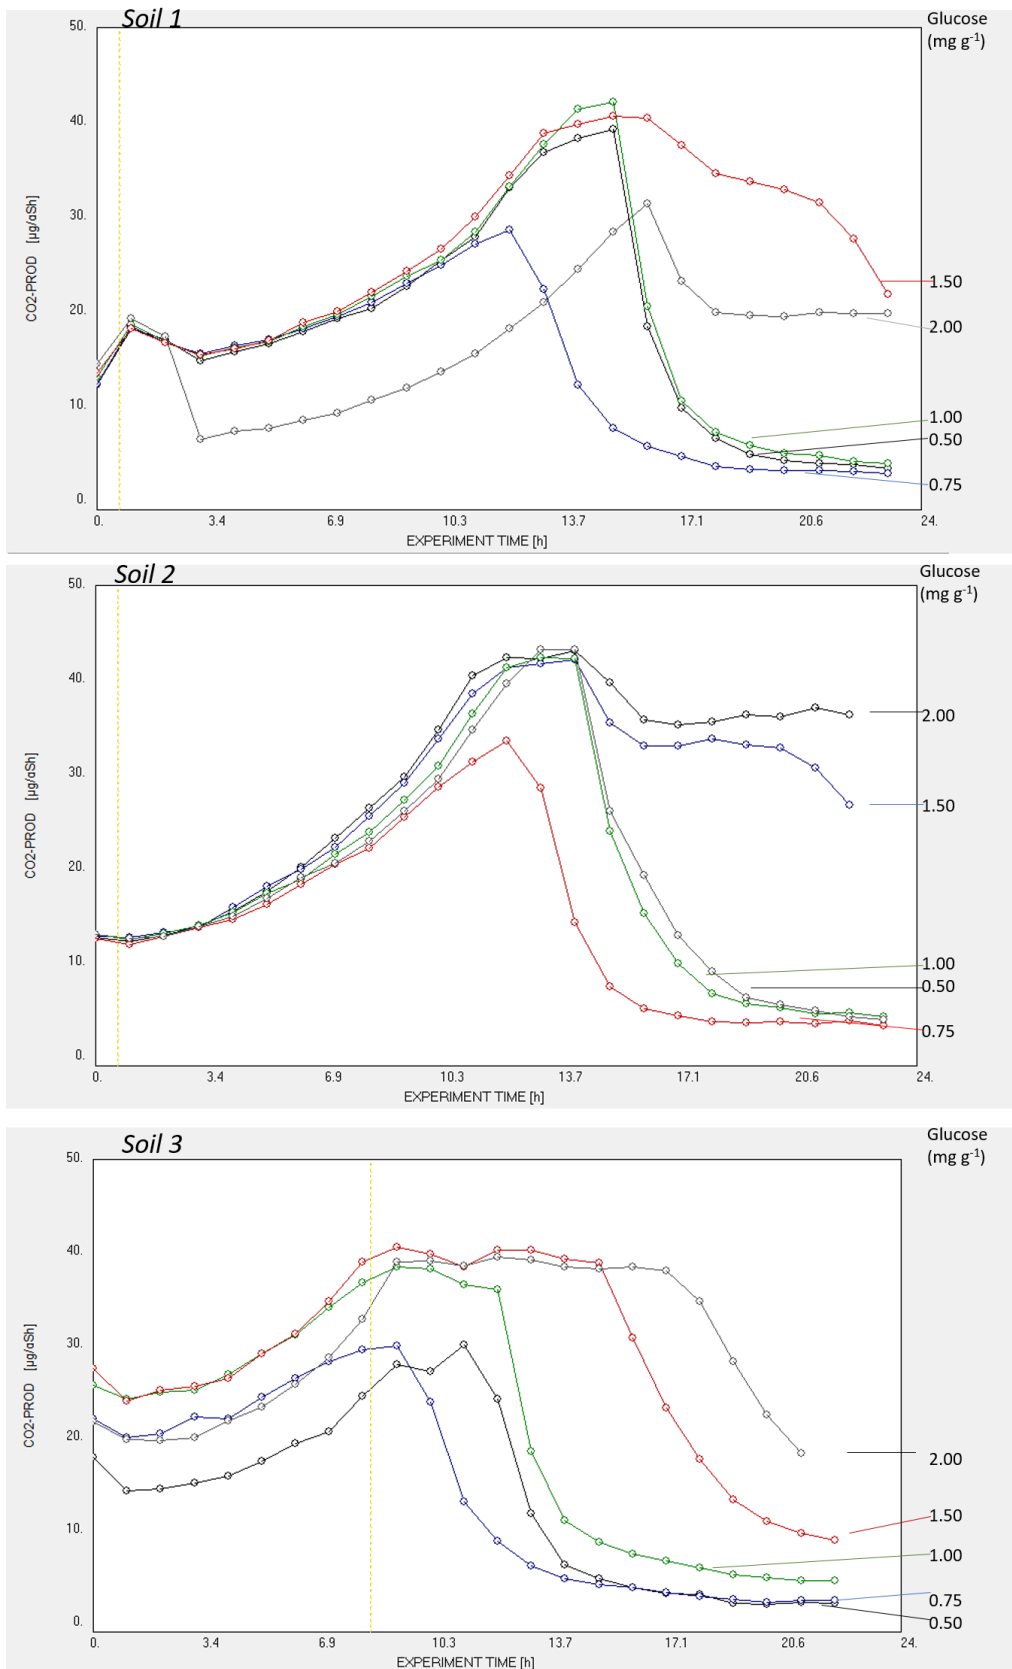

**Figure 1: Respiration curves of pre-experiments derived from data analysis using the computer program “SIR-SBA 4.00” (Heinemeyer, copyright MasCo Analytik, Hildesheim, Germany) for Soils 1 -3. Here results for experiments with glucose concentrations between 0.5 and 2 mg g<sup>-1</sup> are presented as examples for one replicate each.**

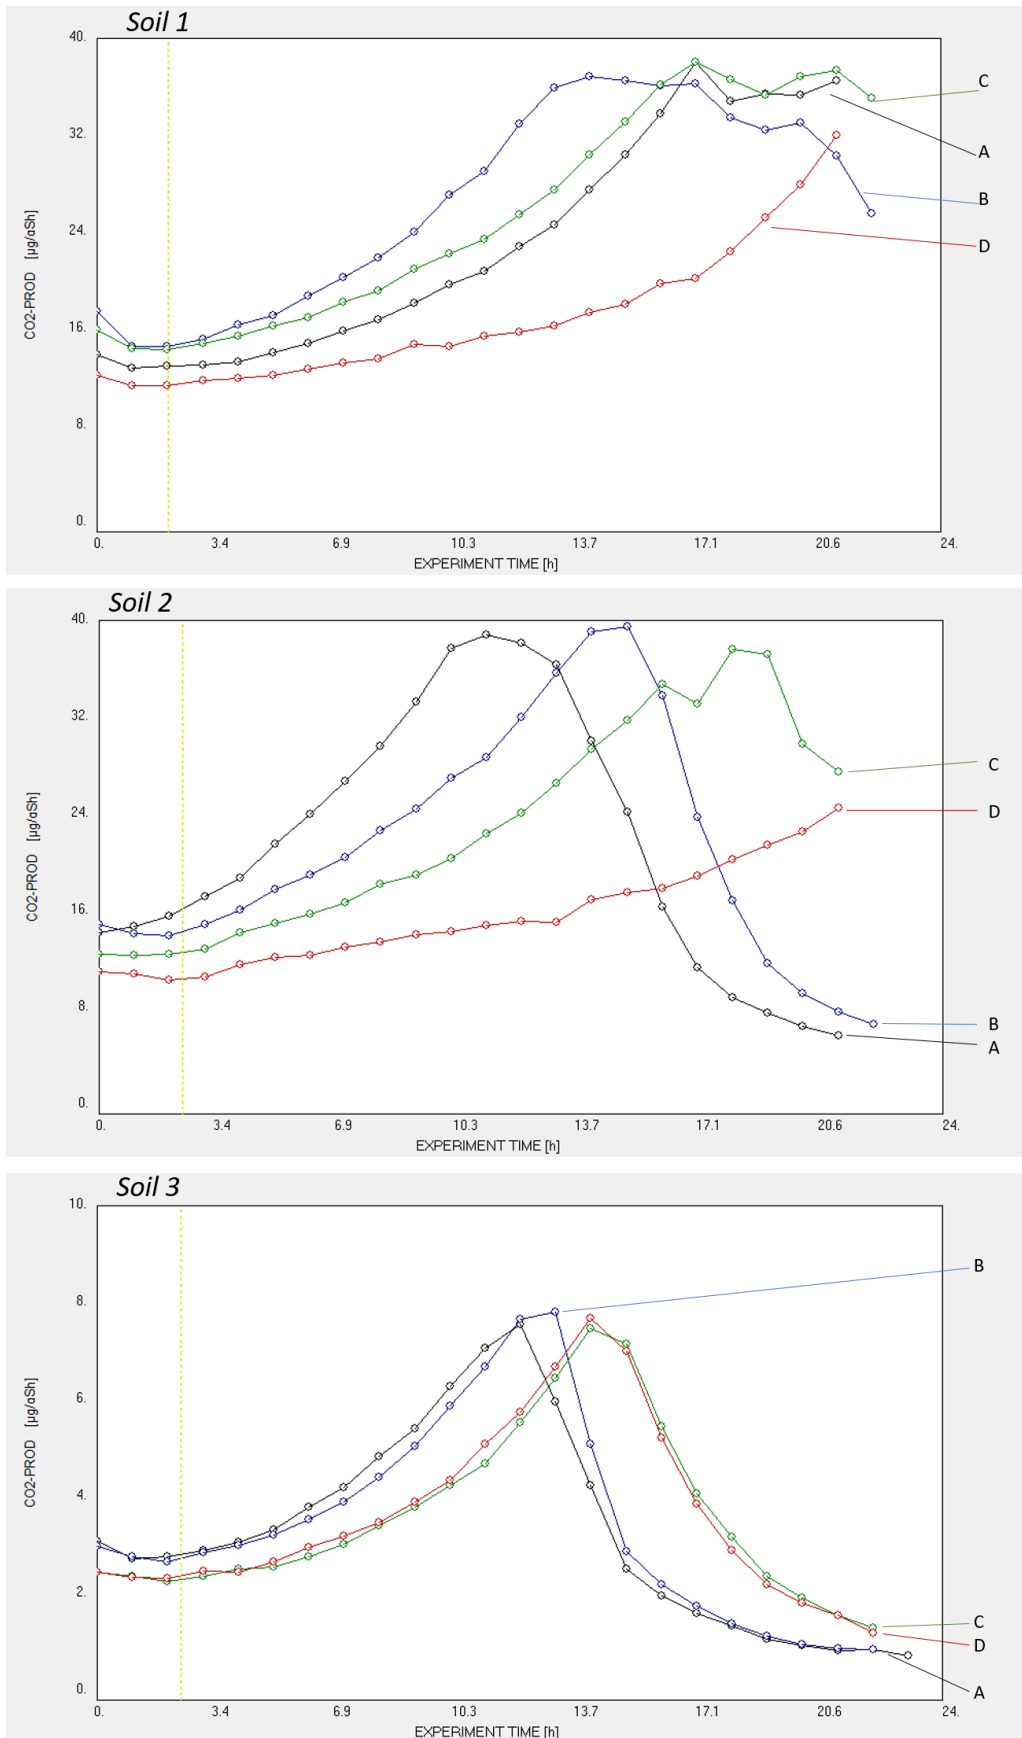

25 **Figure S2:** Respiration curves of the pre-experiment for SIRIN approach derived from data analysis using the computer program “SIR-SBA 4.00” (Heinemeyer, copyright MasCo Analytik, Hildesheim, Germany) with optimum inhibitor concentrations. The examples represent treatment A without growth inhibition, treatment B with 1.0 mg g<sup>-1</sup> dw soil

streptomycin, treatment C with 0.75 mg g<sup>-1</sup> dw soil cycloheximide and D with both inhibitors for experiments with *Soil I-3*. Results show curves as an example for one replicate each.

30 Table S2: SP values of produced N<sub>2</sub>O, i.e. without its reduction to N<sub>2</sub>, of variant -C<sub>2</sub>H<sub>2</sub> ( $SP_{prod}$ ) calculated by the Rayleigh-type model according to Lewicka-Szczebak et al. (2017) and Senbayram et al. (2018) (Eq. 7) using the isotope effect of N<sub>2</sub>O reduction from the literature (-6‰) (Yu et al., 2020) and the  $r_{15N}$ .

| Experiment                                      | Treatment/variant                  | $SP_{prod}$ |
|-------------------------------------------------|------------------------------------|-------------|
| <i>Soil 1.1</i><br>(Loamy sand,<br>summer 2011) | A / -C <sub>2</sub> H <sub>2</sub> | 2.71        |
|                                                 | B / -C <sub>2</sub> H <sub>2</sub> | -1.80       |
|                                                 | C / -C <sub>2</sub> H <sub>2</sub> | 2.40        |
|                                                 | D / -C <sub>2</sub> H <sub>2</sub> | -0.71       |
| <i>Soil 1.2</i><br>(Loamy sand,<br>winter 2012) | A / -C <sub>2</sub> H <sub>2</sub> | 0.91        |
|                                                 | B / -C <sub>2</sub> H <sub>2</sub> | 0.37        |
|                                                 | C / -C <sub>2</sub> H <sub>2</sub> | 1.06        |
|                                                 | D / -C <sub>2</sub> H <sub>2</sub> | -0.03       |
| <i>Soil 2</i><br>(Sand, winter<br>2012)         | A / -C <sub>2</sub> H <sub>2</sub> | -1.00       |
|                                                 | B / -C <sub>2</sub> H <sub>2</sub> | -1.64       |
|                                                 | C / -C <sub>2</sub> H <sub>2</sub> | -1.40       |
|                                                 | D / -C <sub>2</sub> H <sub>2</sub> | -1.03       |
| <i>Soil 3</i><br>(Silt loam,<br>winter 2013)    | A / -C <sub>2</sub> H <sub>2</sub> | 0.02        |
|                                                 | B / -C <sub>2</sub> H <sub>2</sub> | -0.62       |
|                                                 | C / -C <sub>2</sub> H <sub>2</sub> | -0.89       |
|                                                 | D / -C <sub>2</sub> H <sub>2</sub> | -1.43       |

#### References:

35 Anderson, J. P. E., and Domsch, K. H.: Quantification of bacterial and fungal contributions to soil respiration, *Archiv Fur Mikrobiologie*, 93, 113-127, doi:10.1007/BF00424942, 1973.

Anderson, J. P. E., and Domsch, K. H.: Measurement of bacterial and fungal contributions to respiration of selected agricultural and forest soil, *Canadian Journal of Microbiology*, 21, 314-322, doi: 10.1139/m75-045, 1975.

40 Anderson, J. P. E., and Domsch, K. H.: Physiological method for quantitative measurement of microbial biomass in soils, *Soil Biol. Biochem.*, 10, 215-221, doi:10.1016/0038-0717(78)90099-8, 1978.

45 Lewicka-Szczebak, D., Augustin, J., Giesemann, A., and Well, R.: Quantifying N<sub>2</sub>O reduction to N<sub>2</sub> based on N<sub>2</sub>O isotopocules – validation with independent methods (helium incubation and <sup>15</sup>N gas flux method), *Biogeosciences*, 14, 711-732, doi: 10.5194/bg-14-711-2017, 2017.

- 50 Lewicka-Szczebak, D., Lewicki, M. P., and Well, R.: N<sub>2</sub>O isotope approaches for source partitioning of N<sub>2</sub>O production and estimation of N<sub>2</sub>O reduction – validation with the <sup>15</sup>N gas-flux method in laboratory and field studies, *Biogeosciences*, 17, 5513-5537, 10.5194/bg-17-5513-2020, 2020.
- 55 Ostrom, N. E., Sutka, R., Ostrom, P. H., Grandy, A. S., Huizinga, K. M., Gandhi, H., von Fischer, J. C., and Robertson, G. P.: Isotopologue data reveal bacterial denitrification as the primary source of N<sub>2</sub>O during a high flux event following cultivation of a native temperate grassland, *Soil Biol. Biochem.*, 42, 499-506, doi: 10.1016/j.soilbio.2009.12.003, 2010.
- 60 Senbayram, M., Well, R., Bol, R., Chadwick, D. R., Jones, D. L., and Wu, D.: Interaction of straw amendment and soil NO<sub>3</sub><sup>-</sup> content controls fungal denitrification and denitrification product stoichiometry in a sandy soil, *Soil Biol. Biochem.*, 126, 204-212, doi: 10.1016/j.soilbio.2018.09.005, 2018.
- 65 Toyoda, S., and Yoshida, N.: Determination of nitrogen isotopomers of nitrous oxide on a modified isotope ratio mass spectrometer, *Anal. Chem.*, 71, 4711-4718, 10.1021/ac9904563, 1999.
- 65 Yu, L., Harris, E., Lewicka-Szczebak, D., Barthel, M., Blomberg, M. R. A., Harris, S. J., Johnson, M. S., Lehmann, M. F., Liisberg, J., Müller, C., Ostrom, N. E., Six, J., Toyoda, S., Yoshida, N., and Mohn, J.: What can we learn from N<sub>2</sub>O isotope data? - Analytics, processes and modelling, *Rapid Commun Mass Spectrom*, doi: 10.1002/rcm.8858, 2020.
